# Supplementary material
Source: PubMed Central journal article supplement (PMC3627665)
Supplement: auto-9-476-s01.pdf [file auto-9-476-s01.pdf]

## **Supplemental Material to:**

**Francesca Benato, Tatjana Skobo, Giorgia Gioacchini,  
Isabella Moro, Fabiola Ciccocanti, Mauro Piacentini,  
Gian Maria Fimia, Oliana Carnevali and Luisa Dalla Valle**

**Ambra1 knockdown in zebrafish leads to incomplete  
development due to severe defects in organogenesis**

**Autophagy 2012; 9(4)**

**<http://dx.doi.org/10.4161/auto.23278>**

**[www.landesbioscience.com/journals/autophagy/article/23278](http://www.landesbioscience.com/journals/autophagy/article/23278)**

S-Fig. 1. Schematic representation of the cloning strategy for *ambra1a1*, *a2*, *a3*, *a4* and *ambra1b* zebrafish cDNAs. Primers used are indicated.

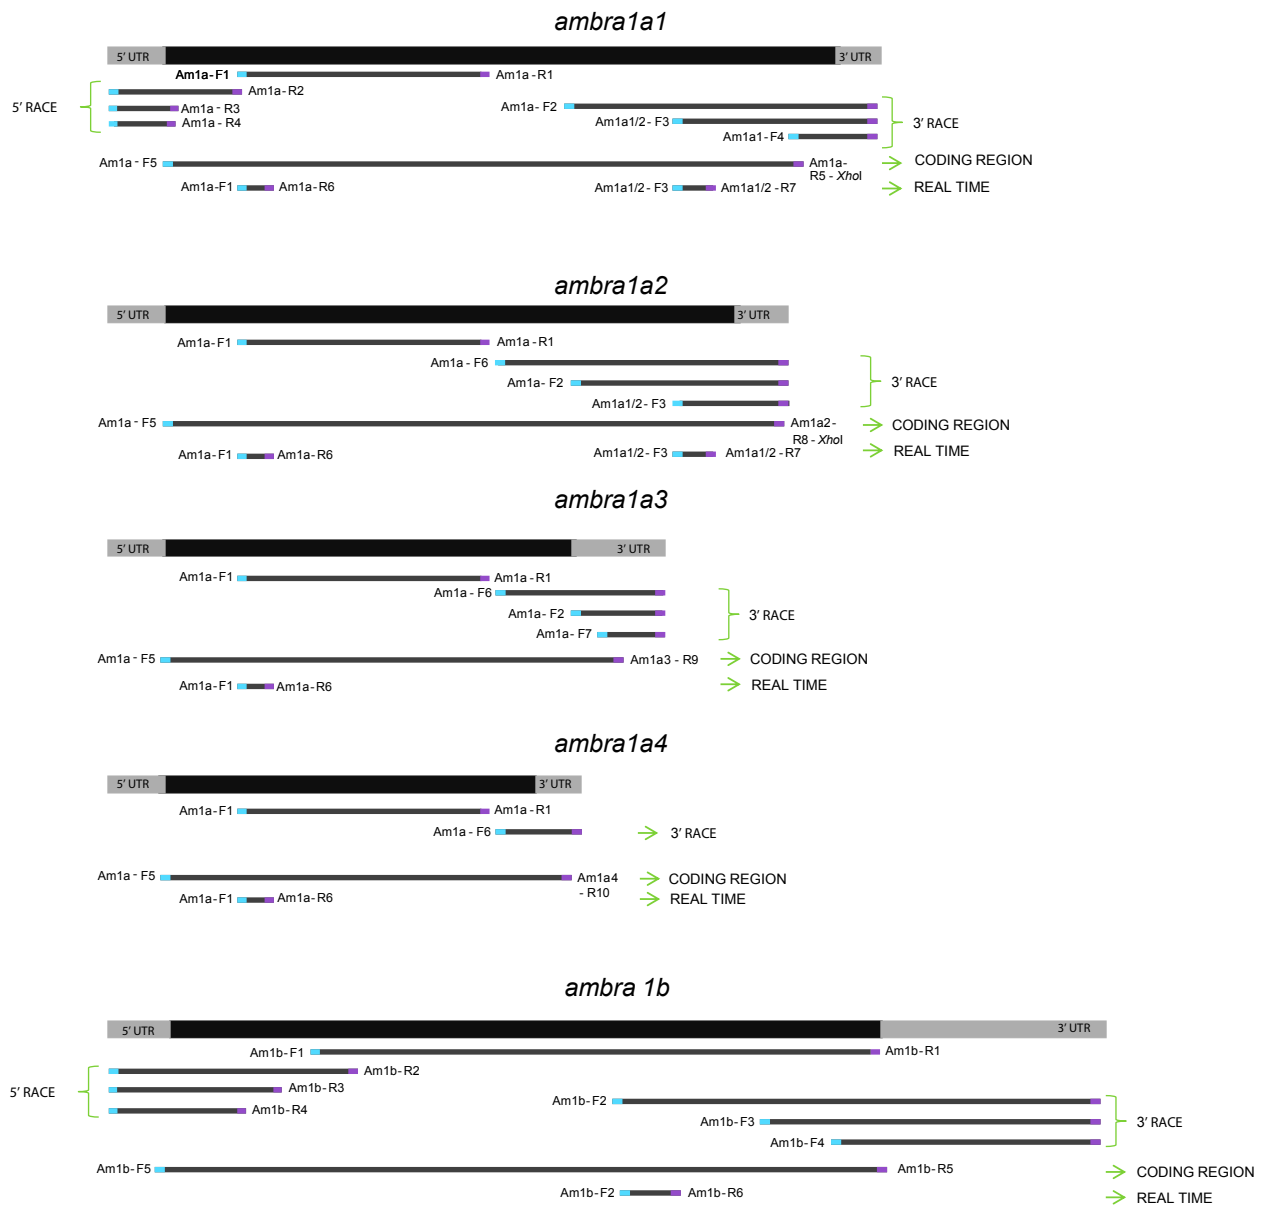

S-Fig. 2. Validation of the *ATG*MOs and *SPLIC*MOs mediated knockdown of *ambra1* genes. (A) Control experiments to verify the *ATG*MOs-mediated knockdown of *ambra1a* and *ambra1b*. *ambra1a*- and *ambra1b*-EGFP mRNAs were coinjected with *ATG*MOs as indicated inside each image, and embryos were examined for the presence of EGFP fluorescence at 24 hpf. All the embryos are lateral view, anterior to the left. Bar= 200  $\mu$ m. (B) RT-PCR analysis with cDNA of 4, 6, 8, 12 and 24 hpf embryos (controls and *SPLIC*MOs-injected) confirmed deletion of exons 3 in the *ambra1a* and *b* transcripts. The arrow-head indicates the residual wild-type transcripts at the different stages. Under the agarose gel, sequences of the misspliced *ambra1a* and *b* transcripts show the loss of exon 3 (arrow) and the introduction of a premature stop codon.

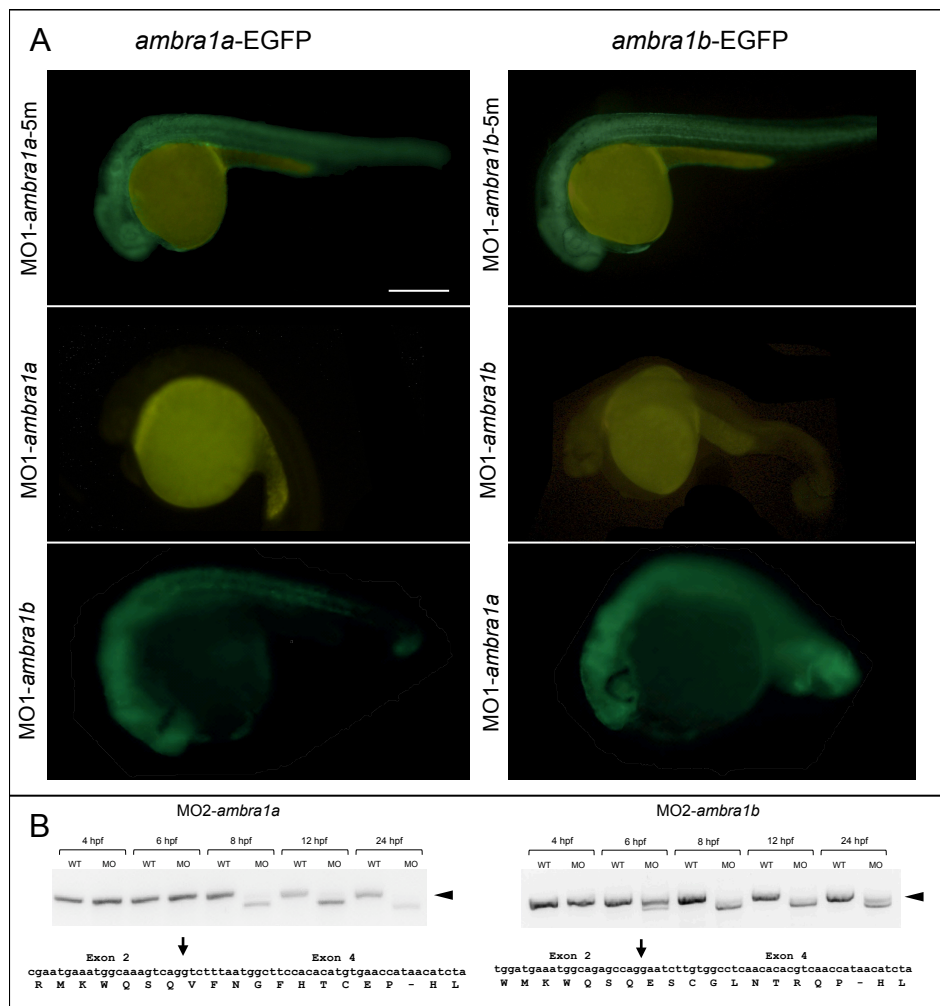

S-Fig. 3. Alkaline phosphatase staining showing well-organized sub-intestinal vessels (SIVs) in WT larvae at 3 dpf. In *ambra1*-MOs-injected larvae SIVs are reduced or absent and pattern of intersegmental vessels in the trunk and tail are also less defined. Bar= 200  $\mu$ m. Sv=sub-intestinal vessels.

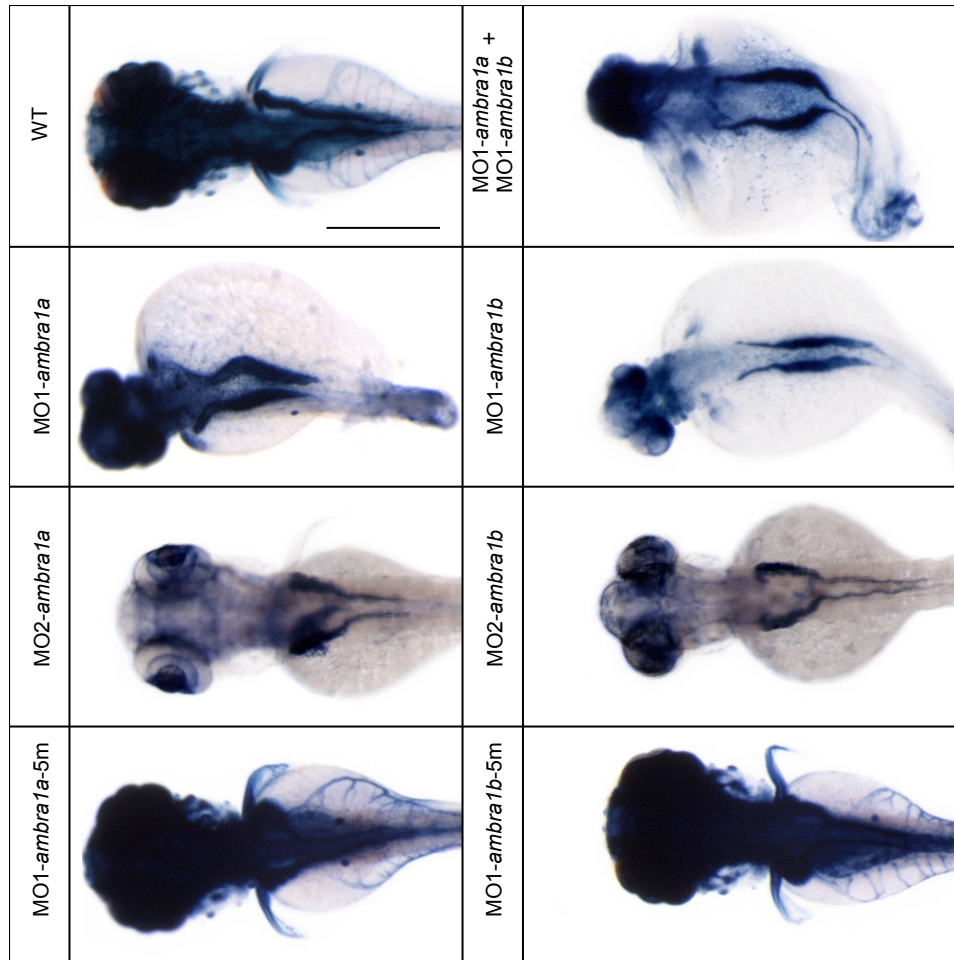

Supplementary Table 1. Exons and introns size of *Mus musculus* and *Danio rerio ambra1* genes.

|                             | 1°<br>ex | 1°<br>intr | 2°<br>ex | 2°<br>intr | 3°<br>ex | 3°intr | 4°<br>ex | 4°<br>intr | 5°<br>ex | 5°<br>intr | 6°<br>ex | 6°intr | 7°<br>ex | 7°<br>intr | 8°<br>ex | 8°<br>intr | 9°<br>ex | 9°intr | 10°<br>ex | 10°<br>intr | 11°<br>ex | 11°<br>intr | 12°<br>ex | 12°intr | 13°<br>ex | 13°<br>intr | 14°<br>ex | 14°<br>intr | 15°<br>ex | 15°intr | 16°<br>ex | 16°intr | 17°<br>ex | 17°<br>intr | 18°<br>ex | 18°<br>intr | 19°<br>ex |
|-----------------------------|----------|------------|----------|------------|----------|--------|----------|------------|----------|------------|----------|--------|----------|------------|----------|------------|----------|--------|-----------|-------------|-----------|-------------|-----------|---------|-----------|-------------|-----------|-------------|-----------|---------|-----------|---------|-----------|-------------|-----------|-------------|-----------|
| <i>Mus musculus Ambra1</i>  | 201      | 36070      | 254      | 350        | 59       | 570    | 178      | 1030       | 180      | 1820       | 65       | 1310   | 1459     | 31260      | 87       | 4920       | 182      | 14250  | 79        | 710         | 100       | 50360       | 113       | 9770    | 189       | 1030        | 155       | 13520       | 137       | 9710    | 92        | 1020    | 197       | 5720        | 878       |             |           |
| <i>Danio rerio ambra1a1</i> | 206      | 3010       | 233      | 2168       | 59       | 167    | 184      | 113        | 173      | 986        | 67       | 97     | 1373     | 7293       | 87       | 4736       | 183      | 2268   | 78        | 917         | 101       | 19177       | 111       | 20026   | 189       | 3132        | 155       | 4999        | 140       | 3466    | 111       | 3226    | 209       | 21056       | 132       | 3025        | 733       |
| <i>Danio rerio ambra1a2</i> | 206      | 3010       | 233      | 2168       | 59       | 167    | 184      | 113        | 173      | 986        | 67       | 97     | 1373     | 7293       | 87       | 4736       | 183      | 2268   | 78        | 917         | 101       | 19177       | 111       | 20026   | 189       | 3132        | 155       | 4999        | 140       | 3466    | 111       | 3226    | 507       |             |           |             |           |
| <i>Danio rerio ambra1a3</i> | 206      | 3010       | 233      | 2168       | 59       | 167    | 184      | 113        | 173      | 986        | 67       | 97     | 1373     | 7293       | 87       | 4736       | 183      | 2268   | 78        | 917         | 340       |             |           |         |           |             |           |             |           |         |           |         |           |             |           |             |           |
| <i>Danio rerio ambra1a4</i> | 206      | 3010       | 233      | 2168       | 59       | 167    | 184      | 113        | 173      | 986        | 67       | 97     | 1373     | 7293       | 87       | 4736       | 548      |        |           |             |           |             |           |         |           |             |           |             |           |         |           |         |           |             |           |             |           |
| <i>Danio rerio ambra1b</i>  | 266      | 801        | 217      | 1462       | 59       | 104    | 184      | 233        | 173      | 437        | 67       | 115    | 1463     | 2937       | 87       | 275        | 183      | 163    | 81        | 2285        | 101       | 103         | 111       | 115     | 189       | 412         | 155       | 2050        | 140       | 4475    | 99        | 95      | 203       | 2009        | 123       | 3125        | 1802      |

Supplementary Table 2. Effects of different dosages of morpholinos on the percentages of dead fish and of normal and abnormal phenotypes calculated from the number of surviving prelarvae at 3 dpf.

| MO1- <i>ambra1a</i>                       | n.  | Dead (%) | n. surviving | Normal (%) | Abnormal (%) |
|-------------------------------------------|-----|----------|--------------|------------|--------------|
| 8.2 ng/embryo                             | 161 | 12±6     | 141          | 50±3       | 50±3         |
| 10.3 ng/embryo                            | 328 | 17±2     | 271          | 31±9       | 69±9         |
| 15.5 ng/embryo                            | 354 | 24±12    | 269          | 30±6       | 70±6         |
| 20.6 ng/embryo                            | 350 | 25±17    | 260          | 10±8       | 90±8         |
| 25.8 ng/embryo                            | 278 | 47±6     | 147          | 4±8        | 96±8         |
| MO2- <i>ambra1a</i>                       | n.  | Dead (%) | n. surviving | Normal (%) | Abnormal (%) |
| 8.2 ng/embryo                             | 183 | 3±1      | 176          | 96±3       | 4±3          |
| 10.3 ng/embryo                            | 152 | 3±4      | 147          | 89±2       | 11±2         |
| 15.5 ng/embryo                            | 151 | 6±1      | 142          | 87±2       | 13±2         |
| 18.5 ng/embryo                            | 269 | 19±7     | 218          | 64±6       | 36±6         |
| 20.6 ng/embryo                            | 173 | 22±7     | 136          | 67±4       | 33±4         |
| 25.8 ng/embryo                            | 185 | 47±6     | 99           | 71±5       | 29±5         |
| MO1- <i>ambra1a</i> -5m                   | n.  | Dead (%) | n. surviving | Normal (%) | Abnormal (%) |
| 8.2 ng/embryo                             | 164 | 1±2      | 162          | 99±0       | 1±0          |
| 10.3 ng/embryo                            | 304 | 14±7     | 269          | 94±3       | 6±3          |
| 15.5 ng/embryo                            | 321 | 11±12    | 277          | 93±5       | 7±5          |
| 20.6 ng/embryo                            | 294 | 36±5     | 182          | 92±3       | 8±3          |
| 25.8 ng/embryo                            | 245 | 30±5     | 164          | 82±9       | 18±9         |
| MO1- <i>ambra1b</i>                       | n.  | Dead (%) | n. surviving | Normal (%) | Abnormal (%) |
| 8.2 ng/embryo                             | 159 | 5±4      | 151          | 64±4       | 36±4         |
| 10.3 ng/embryo                            | 195 | 2±2      | 189          | 61±7       | 39±7         |
| 15.5 ng/embryo                            | 298 | 4±1      | 286          | 32±7       | 68±7         |
| 20.6 ng/embryo                            | 317 | 29±9     | 226          | 16±8       | 84±8         |
| 25.8 ng/embryo                            | 231 | 36±16    | 150          | 14±7       | 86±7         |
| MO2- <i>ambra1b</i>                       | n.  | Dead (%) | n. surviving | Normal (%) | Abnormal (%) |
| 8.2 ng/embryo                             | 163 | 7±1      | 153          | 87±2       | 13±2         |
| 10.3 ng/embryo                            | 174 | 6±3      | 165          | 74±7       | 26±7         |
| 15.5 ng/embryo                            | 271 | 7±1      | 253          | 45±3       | 55±3         |
| 20.6 ng/embryo                            | 161 | 13±10    | 141          | 22±2       | 78±2         |
| 25.8 ng/embryo                            | 180 | 30±7     | 127          | 38±3       | 62±3         |
| MO1- <i>ambra1b</i> -5m                   | n.  | Dead (%) | n. surviving | Normal (%) | Abnormal (%) |
| 8.2 ng/embryo                             | 161 | 1±1      | 160          | 98±1       | 2±1          |
| 10.3 ng/embryo                            | 218 | 3±1      | 209          | 91±3       | 9±3          |
| 15.5 ng/embryo                            | 286 | 7±5      | 267          | 92±3       | 8±3          |
| 20.6 ng/embryo                            | 318 | 7±2      | 295          | 83±7       | 17±7         |
| 25.8 ng/embryo                            | 287 | 13±6     | 249          | 77±8       | 23±8         |
| MO1- <i>ambra1a</i> + MO1- <i>ambra1b</i> | n.  | Dead (%) | n. surviving | Normal (%) | Abnormal (%) |
| 1/2 ng/embryo                             | 276 | 55±8     | 128          | 24±3       | 76±3         |
| 1/4 ng/embryo                             | 283 | 23±4     | 215          | 26±4       | 74±4         |

Supplementary Table 3. Effects of different mRNAs coinjected with MOs on the percentages of dead embryos and of normal and abnormal phenotypes calculated from the number of surviving prelarvae at 3 dpf.

|                                                                                                                                                                   | n.  | Dead (%) | n. surviving | Normal (%) | Abnormal (%) |
|-------------------------------------------------------------------------------------------------------------------------------------------------------------------|-----|----------|--------------|------------|--------------|
| MO1- <i>ambrala</i><br>+ <b>20ng</b> mRNA <i>ambrala1</i>                                                                                                         | 164 | 46±9     | 90           | 39±7       | 61±7         |
| MO1- <i>ambrala</i><br>+ <b>15ng</b> mRNA <i>ambrala3</i>                                                                                                         | 170 | 51±4     | 83           | 28±5       | 72±5         |
| MO1- <i>ambrala</i><br>+ <b>20ng</b> mRNA <i>ambrala1</i><br>+ <b>15ng</b> mRNA <i>ambrala3</i>                                                                   | 160 | 30±3     | 112          | 73±7       | 23±7         |
| MO1- <i>ambrala</i><br>+ <b>20ng</b> mRNA <i>ambrala1b</i>                                                                                                        | 240 | 58±12    | 121          | 35±7       | 65±7         |
| MO1- <i>ambrala1b</i><br>+ <b>20ng</b> mRNA <i>ambrala1b</i>                                                                                                      | 329 | 35±5     | 224          | 73±9       | 27±9         |
| MO1- <i>ambrala1b</i><br>+ <b>20ng</b> mRNA <i>ambrala1</i>                                                                                                       | 152 | 24±6     | 105          | 31±6       | 69±6         |
| MO1- <i>ambrala</i><br>+ MO1- <i>ambrala1b</i><br>+ <b>20ng</b> mRNA <i>ambrala1</i><br>+ <b>15ng</b> mRNA <i>ambrala3</i><br>+ <b>20ng</b> mRNA <i>ambrala1b</i> | 177 | 39±10    | 110          | 65±10      | 35±10        |

Supplementary Table 4. List of Primers used in this work. The recognition sequences for restriction enzymes are shown in bold italic letters.

| Primer                 | SEQUENCE 5'-3'                                        |
|------------------------|-------------------------------------------------------|
| Amla-F1                | CTGCTGCTCATTGCCACC (18)                               |
| Amla-F2                | GCAACGCACTCATCCGTC (18)                               |
| Amla1/2-F3             | GTCGATGTGCATTCTGATGG (20)                             |
| Amla1-F4               | CGGAGTCTTTAGCTGCAGC (19)                              |
| Amla-F5                | GAGGAAGAGTGTGGAGATG (21)                              |
| Amla-F6                | ACAGTCTGCCTCCTCTCG (18)                               |
| Amla-F7                | AGGAGGACTCTCAGCTGG (18)                               |
| Amla-M-F- <i>Clal</i>  | <b>CCATCGAT</b> GGCTCAGCAACAGTCTTTCGTGATGAAGCTGG (40) |
| Amla-5'-F- <i>XbaI</i> | <b>GCTCTAGAG</b> CGGTAGCAGCAGAGGTAG (27)              |
| Amla-R1                | CTGCTCCTCATGCTGACC (18)                               |
| Amla-R2                | GTGGCAATGAGCAGCAGC (18)                               |
| Amla-R3                | ACAAGCTGCTGCAGAACC (18)                               |
| Amla-R4                | CGCTCTCGACTGGACAGG (18)                               |
| Amla1-R5- <i>XhoI</i>  | <b>CCGCTCGAG</b> CGGGATAACTACTATCGCTGTTGC (33)        |
| Amla-R6                | CGCATCTCCACTGTCC (18)                                 |
| Amla1/2-R7             | GCTGGTTCTGTGTCTGCG (18)                               |
| Amla2-R8- <i>XhoI</i>  | <b>CCGCTCGAG</b> CGGCGGATGGACTTCACTCAC (30)           |
| Amla3-R9               | CGTCCTACAGTAACTTTGCAC (21)                            |
| Amla4-R10              | CTCTGGTAGAATCGTTGGC (19)                              |
| Amla-5'-R- <i>KpnI</i> | <b>CGGGGTACC</b> CCGGTCTCTGTCCCAGC (28)               |
| Amlb-F1                | GCATACCACGTCAGACTCG (19)                              |
| Amlb-F2                | AGGTGACGGACAGTCAGC (18)                               |
| Amlb-F3                | GAACACACACACCACATCC (19)                              |
| Amlb-F4                | GTAGACTCTCTAGAAGCTCC (20)                             |
| Amlb-F5                | GCGTGCTGCTGAGTTAGTG (19)                              |
| Amlb-M-F- <i>Clal</i>  | <b>CCATCGAT</b> GGGGTGCAGGACTTAACAGCATAAATGGC (37)    |
| Amlb-F5- <i>XbaI</i>   | <b>GCTCTAGAG</b> CGTGCTGCTGAGTTAGTG (27)              |
| Amlb-R1                | TCTGCCATACAGGTCGTC (18)                               |
| Amlb-R1- <i>XhoI</i>   | <b>CCGCTCGAG</b> CGGACTATCTGCCATACAGGTCG (33)         |
| Amlb-R2                | CTGAGTTCCTGCAGTCC (18)                                |
| Amlb-R3                | AAGCCATCTCCATACTATCC (20)                             |
| Amlb-R4                | CGATGAGGAGAAGCTGAGC (19)                              |
| Amlb-R5                | <b>CCGCTCGAG</b> CGGTCCAGCACCATGCAGACC (30)           |
| Amlb-R6                | CCTACCATCACATAGCAGC (19)                              |
| Amlb-5'-R- <i>KpnI</i> | <b>CGGGGTACC</b> CCGTCTGTTCTGCACAGCCA (29)            |
| LC3-F                  | GAGAAGTTTTTGCCGCTCT (20)                              |
| LC3-R                  | ACCTGTGTCCGAACATCTCC (20)                             |
| BECLIN-F               | GGACCACTTGAACAAC (18)                                 |
| BECLIN-R               | CCGAAGTTCTTCAGTGTCATC (21)                            |
| ARP-F                  | CTGAACATCTCGCCTTCTC (19)                              |
| ARP-R                  | TAGCCGATCTGCAGACAC (19)                               |
| 18S-F                  | TCGAATGTCTGCCCTATCAACT (21)                           |
| 18S-R                  | AGACTTGCCCTCCAATGGATC (20)                            |



Supplementary Table 5. List of markers used in the whole-mount *in situ* hybridization analyses

| Gene                   | Reference                                            | GenBank cDNA reference | Vector           | Endonuclease and RNA polymerase |
|------------------------|------------------------------------------------------|------------------------|------------------|---------------------------------|
| <i>chd</i>             | Miller-Bertoglio <i>et al.</i> , 1997. <sup>38</sup> | AF034606               | pBluescriptKS(+) | <i>SpeI</i> , T7                |
| <i>gsc</i>             | Schulte-Merker <i>et al.</i> , 1994. <sup>39</sup>   | NM_131017              | pBS SK           | <i>BamHI</i> , T7               |
| <i>shha</i>            | Krauss <i>et al.</i> , 1993. <sup>40</sup>           | NM_131063              | pCS2+            | <i>HindIII</i> , T7             |
| <i>z-am1a1</i> -3'-UTR | This work                                            | XM_002667669           | pGEM             | <i>ApaI</i> , Sp6               |
| <i>z-am1b</i> -3'-UTR  | This work                                            | XR_084457              | pGEM             | <i>Sall</i> , T7                |

Supplementary Table 6. Summary of the ratio of abnormal phenotypes present in each class.

| Deformity grade                                                                                                                                                                                                                                      | MO1-<br><i>ambra1a</i> | MO1-<br><i>ambra1a</i><br>+<br><i>tp53MO</i> | MO2-<br><i>ambra1a</i> | MO1-<br><i>ambra1b</i> | MO1-<br><i>ambra1b</i><br>+<br><i>tp53MO</i> | MO2-<br><i>ambra1b</i> | MO1-<br><i>ambra1a</i> +<br>MO1-<br><i>ambra1b</i> |
|------------------------------------------------------------------------------------------------------------------------------------------------------------------------------------------------------------------------------------------------------|------------------------|----------------------------------------------|------------------------|------------------------|----------------------------------------------|------------------------|----------------------------------------------------|
| N° of injected eggs                                                                                                                                                                                                                                  | 354                    | 320                                          | 269                    | 317                    | 288                                          | 271                    | 283                                                |
| Dead (%)                                                                                                                                                                                                                                             | 24±12                  | 21±9                                         | 19±7                   | 29±9                   | 13±11                                        | 7±1                    | 23±4                                               |
| N° surviving                                                                                                                                                                                                                                         | 269                    | 250                                          | 218                    | 226                    | 253                                          | 253                    | 215                                                |
| Normal (%)                                                                                                                                                                                                                                           | 30±6                   | 38±9                                         | 64±6                   | 16±8                   | 43±6                                         | 45±3                   | 26±4                                               |
| Tot. abnormal (%):                                                                                                                                                                                                                                   | 70 ±6                  | 62±9                                         | 36±6                   | 84±8                   | 57±6                                         | 55±3                   | 74±4                                               |
| <u>Abnormal class I</u><br>- slight developmental delay<br>- smaller eyes and otoliths<br>- ventral curvature of the spine with misshapen tail<br>- pericardial oedema and persistent voluminous and oedematous yolk sac<br>- slight ventralization* | 68±8*                  | 53±14*                                       | 36±6                   | 77±14                  | 55±6                                         | 55±3                   | 63±3*                                              |
| <u>Abnormal class II</u><br>- smaller head, eyes and otoliths<br>- curved or twisted tail<br>- pericardial oedema and persistent voluminous and oedematous yolk sac<br>- delayed pigmentation<br>- ventralization                                    | 2±2                    | 9±5                                          | -                      | 7±9                    | 2±1                                          | -                      | 9±5                                                |
| <u>Abnormal class III</u><br>- extensive morphological alterations with a complete derangement of the body plan                                                                                                                                      | -                      | -                                            | -                      | -                      | -                                            | -                      | 2±1                                                |
